# Supplementary material for: Long-term analysis of 2 prospective studies that incorporate mitomycin C into an adjuvant chemoradiation regimen for pancreatic and periampullary cancers
Source: PubMed Central journal article supplement — Adv Radiat Oncol. 2017 Aug 3;3(1):42–51. doi: 10.1016/j.adro.2017.07.008 (PMC5856978; doi:10.1016/j.adro.2017.07.008), 2017-08-03
Supplement: mmc2.pdf [file mmc2.pdf]

## **SUPPLEMENTARY FIGURE LEGEND**

**Supplemental Figure 1.** Kaplan-Meier OS curve of patients enrolled onto Trial A with (A) a family history of pancreatic ductal adenocarcinoma (PDAC) or (B) breast or ovarian cancer

**SUPPLEMENTARY TABLE**

**Supplemental Table 1.** Treatment schema for Trials A and B

|                    | <b>Trial A (9625)</b>                                                                                                                                          | <b>Trial B (9940)</b>                                                                                                                                                                                                    |
|--------------------|----------------------------------------------------------------------------------------------------------------------------------------------------------------|--------------------------------------------------------------------------------------------------------------------------------------------------------------------------------------------------------------------------|
| Radiation Therapy  | Split-course (2 weeks off)<br>2.5 Gy/24h x 20 treatments                                                                                                       | Continuous (split-course optional)<br>1.8 Gy/24h x 25-30 treatments                                                                                                                                                      |
| 5-fluorouracil     | Bolus (400 mg/m <sup>2</sup> /24h IV x 3 days)                                                                                                                 | Continuous infusion (175 mg/m <sup>2</sup> /24h IV x 28 days)                                                                                                                                                            |
| Leucovorin         | 20 mg/m <sup>2</sup> /24h IV bolus on Days 1-3, 29-31, 71-73 99-101, 127-129, 155-157                                                                          | 20 mg/m <sup>2</sup> /24h IV bolus on Days 1, 8, 15, 22, 127, 134, 141, 148, 176, 183, 190, 197                                                                                                                          |
| Mitomycin C        | 10 mg/m <sup>2</sup> /day on Days 1, 71, 127                                                                                                                   | 8 mg/m <sup>2</sup> /day on Days 1, 49, 126                                                                                                                                                                              |
| Dipyridamole       | Days 0-3, 28-31, 70-73, 98-101, 126-129, 154-157 (75 mg/day p.o. QID)                                                                                          | 75 mg/day p.o. TID x 28 days                                                                                                                                                                                             |
| Treatment Sequence | <p>Split-course chemoradiation<br/>(2 cycles of concurrent chemo)</p> <p style="text-align: center;">↓</p> <p style="text-align: center;">Chemo x 4 cycles</p> | <p>Chemo x 1 cycle</p> <p style="text-align: center;">↓</p> <p>Continuous chemoradiation<br/>(1 cycle of concurrent chemo)</p> <p style="text-align: center;">↓</p> <p style="text-align: center;">Chemo x 2 cycles*</p> |

\*The final cycle of chemotherapy administered in Trial B did not include mitomycin C
